# Supplementary material for: A comprehensive study on hygroscopic behaviour and nitrate depletion of NaNO 3 and dicarboxylic acid mixtures: Implication for the influence factors of nitrate depletion
Source: Copernicus journal article supplement (doi:10.5194/acp-2022-328), 2022-05-25
Supplement: Supplementary file [file acp-2022-328-AC1-supplement.pdf]

1 **Response to Reviewers:**

2 Thanks for the reviewer's comments on our manuscript entitled "A comprehensive study on  
3 hygroscopic behaviour and nitrate depletion of NaNO<sub>3</sub> and dicarboxylic acid mixtures:  
4 Implication for the influence factors of nitrate depletion". The reviewers' comments are helpful for  
5 improving the quality of our work. The responses to the comments and the revisions in manuscript  
6 are given point-to-point below.

7

8 **Reviewer #2:**

9 **Major comments**

- 10 1. My main concern is with the presentation and interpretation of several of the results with  
11 regard to the loss of nitrate from the particles/droplets via evaporation of HNO<sub>3</sub>. As the title  
12 indicates, nitrate depletion is a key interest of this work, yet most of the data provided does  
13 not appear to show direct evidence for nitrate depletion via HNO<sub>3</sub> loss to the gas phase -  
14 contrary to what is stated in the abstract (line 15) and the Results and Discussion section. The  
15 measurements provided characterize the composition and spectral features of nitrate and DCA  
16 species in the condensed phase(s) of deposited particles. However, unless I missed it, HNO<sub>3</sub>(g)  
17 is not measured, nor is the mass of nitrate in the particle phase tracked. If there is substantial  
18 loss of nitrate, the particles should change in nitrate content and overall mass. Moreover, the  
19 loss of nitrate would likely be accompanied by a loss of water. As pointed out in the specific  
20 comments that follow, there are several instances where statements like "... confirms nitrate  
21 depletion and HNO<sub>3</sub> release" are made (e.g. line 133), while the information provided does  
22 not directly support this conclusion. For example, the authors seem to equate the formation of  
23 liquid or solid NaHC<sub>2</sub>O<sub>4</sub> as evidence for nitrate depletion. However, it is not discussed why  
24 that should be a unique signature of such a process. This reviewer argues that (at least some)  
25 dissolved or crystalline NaHC<sub>2</sub>O<sub>4</sub> could also form in the absence of any nitrate depletion,  
26 simply as a result of aqueous solution chemistry and resulting equilibria. I strongly suggest  
27 that the authors rectify this issue and provide direct evidence for HNO<sub>3</sub> loss to the gas phase  
28 or otherwise clarify that their interpretation depends on certain assumptions about the relevant  
29 processes taking place.

30 To be clear, I also consider nitrate depletion via  $\text{HNO}_3$  to be a plausible hypothesis and a  
31 likely explanation for the findings from this work. However, what is missing is quantitative  
32 evidence and/or clarity in the discussion in support of this hypothesis.

33 **Author reply:** First of all, the  $\text{HCl}/\text{HNO}_3$  release from mixed nitrate/chloride and organic  
34 acid particles has been widely detected in field and laboratory measurements (Laskin et al.,  
35 2012; Wang and Laskin, 2014; Ma et al., 2019a; Ghorai et al., 2014; Shao et al., 2018). Laskin's  
36 group has employed the computer controlled scanning electron microscopy with energy  
37 dispersed analysis of X-rays (CCSEM/EDX) to measure the  $\text{Cl}/\text{Na}$  ratios in mixed organic  
38 acid/ $\text{NaCl}$  particles (Laskin et al., 2012; Ghorai et al., 2014) and  $\text{N}/\text{Na}$  ratios in mixed organic  
39 acid/ $\text{NaNO}_3$  particles (Wang and Laskin, 2014). The measurement results clearly  
40 demonstrated the significant chloride/nitrate depletion by organic acids. Ma et al. (2013)  
41 measured the water adsorption isotherms of mixed  $\text{NaCl}/\text{OA}$  particles using vapor sorption  
42 analyzer. The decreased particle mass, i.e., water content therein, indicated the formation of  
43 less hygroscopic  $\text{Na}_2\text{C}_2\text{O}_4$  in internally mixed particles. The corresponding Raman spectra  
44 results also confirmed the chloride depletion. Li et al. (2017) measured the Raman features of  
45 mixed  $\text{NaCl}/\text{MA}$  particles using in situ Raman microspectrometry and found the production of  
46 monosodium malonate in mixtures during the RH cycle, which demonstrated the chloride  
47 depletion and gaseous  $\text{HCl}$  release. Furthermore, the specific reactions of strong acids  
48 displaced by weak acids in aerosols have been summarized and discussed in our previous  
49 review (Chen et al., 2021). Second, our group has persistently utilized the FTIR spectra to  
50 characterize the chemical composition evolutions of aerosol reaction systems (Wang et al.,  
51 2019; Shao et al., 2018; He et al., 2017; Du et al., 2020). For instance, Wang et al. (2019)  
52 observed the ammonium depletion and gaseous  $\text{NH}_3$  release from mixed dicarboxylic acid  
53 salts and  $(\text{NH}_4)_2\text{SO}_4$  aerosols during the RH cycle using the ATR-FTIR technique. Similar to  
54 this work, they measured the IR feature changes of dicarboxylic acid salts and corresponding  
55 DCAs, as well as the efflorescence transition behaviors of mixed particles. The results clearly  
56 demonstrated the compositional evolution and ammonium depletion in mixed dicarboxylic  
57 acid salts and  $(\text{NH}_4)_2\text{SO}_4$  aerosols. Shao et al. (2018) determined the chemical composition  
58 evolution of  $\text{MA}/\text{NaNO}_3$ ,  $\text{MA}/\text{Mg}(\text{NO}_3)_2$  and  $\text{MA}/\text{Ca}(\text{NO}_3)_2$  particles by vacuum FTIR

59 method. The intensity changes of feature bands of  $\text{COO}^-$ ,  $\text{COOH}$  and  $\text{NO}_3^-$  groups indicated  
60 the formation of malonate salts and  $\text{HNO}_3$  release. Finally, the almost unchanged water  
61 content after nitrate depletion for DCA/ $\text{NaNO}_3$  mixtures in this work, e.g., MA/ $\text{NaNO}_3$   
62 mixtures in Fig. 5a in the revised manuscript, might be due to the comparable hygroscopic  
63 properties of malonate salts and MA (Jing et al., 2018; Wu et al., 2011), or limited amounts of  
64 formed dicarboxylic acid salts.

#### 65 **Specific comments**

66 2. Title: phrasing of “Implication for the influence factors of nitrate depletion” needs language  
67 improvement and perhaps a more direct link to aerosols. Consider replacing by “implications  
68 for nitrate depletion in tropospheric aerosols”.

69 **Author reply:** Thanks for the reviewer’s suggestion. We have adopted reviewer’s advice and  
70 revised our manuscript accordingly.

71 3. Line 15: make statement consistent with the data provided (see my major comment).

72 **Author reply:** Thanks for the reviewer’s suggestion. We have illuminated the agreements on  
73 the observations of nitrate/chlorine depletion and  $\text{HNO}_3/\text{HCl}$  release from mixed  
74 nitrate/chlorine and DCA particles via various measurement techniques (including FTIR  
75 spectra) from previous literatures. For clarity, we have revised “ $\text{HNO}_3$  release” into “nitrate  
76 depletion” in Line 15.

77 4. Line 19: “... potentially indicating the transformation of amorphous solids to semisolid  
78  $\text{NaNO}_3$ ; ...”; consider: or the dissolution of  $\text{NaNO}_3$  into a liquid DCA + Water rich phase?

79 **Author reply:** As shown in Fig. S6, no obvious changes of the  $1356\text{ cm}^{-1}$  band assigned to  
80  $\nu_3(\text{NO}_3^-)$  of amorphous  $\text{NaNO}_3$  solids were observed at constant  $\sim 15\%$  RH. Meanwhile, the  
81 liquid water content remained almost unchanged as RH increased from  $\sim 14.8\%$  to  $\sim 61.0\%$   
82 (seen Fig. 3b). Therefore, we can conclude the transformation of amorphous solids to  
83 semisolid  $\text{NaNO}_3$ , rather than the dissolution of  $\text{NaNO}_3$  solids as RH increased to  $\sim 15\%$ .

84 5. Line 39: define abbreviations like DCA, ATR-FTIR and OA at first use in the main text (aside  
85 from the abstract).

86 **Author reply:** Thanks for the reviewer’s suggestion. We have adopted reviewer’s advice and  
87 revised our manuscript accordingly.

88 6. Line 42: there are several directly relevant studies on hygroscopicity and surface tension  
89 effects that could be cited here; e.g. Peng et al. (2001, 10.1021/es0107531), Ovadnevaite et al.  
90 (2017, doi:10.1038/nature22806), Hodas et al. (2015, doi:10.5194/acp-15-5027-2015).

91 **Author reply:** Thanks for the reviewer's suggestion. We have adopted the reviewer's advice  
92 and revised our manuscript accordingly.

93 7. Line 43: "It is well known that the displacement of strong acids, i.e., HCl or HNO<sub>3</sub>, by weak  
94 organic acids, e.g., DCAs, is not thermodynamically favoured in bulk solution". This  
95 statement requires citation of a relevant reference. Note that even if the thermodynamic  
96 equilibrium is favouring the left hand side of reaction (R1), there will be some amounts of  
97 HCl or HNO<sub>3</sub> dissolved and if gas phase exchange is possible, there will be a continuous loss  
98 of the right hand side, consuming the reactants of R1 over possibly long time (depending on  
99 bulk vs. small aerosols). Therefore, given that in an aqueous phase, NaNO<sub>3</sub> will be present  
100 mostly in the form of Na<sup>+</sup> and NO<sub>3</sub><sup>-</sup>, some NaA(aq) (or solid) and/or Na<sup>+</sup> and A<sup>-</sup> may be  
101 present even in the absence of any evaporation of HNO<sub>3</sub>.

102 **Author reply:** Thanks for the reviewer's suggestion. The HNO<sub>3</sub> and HCl are the stronger  
103 acids compared to DCAs, and the displacement of weak DCAs by strong HNO<sub>3</sub> or HCl is  
104 thermodynamically favoured in bulk solutions. Contrary to this, the displacement of strong  
105 acids by weak organic acids is not thermodynamically favoured in bulk solutions. While in  
106 aerosol phases, the equilibrium of reaction R1 would shift to the right due to the efficient  
107 evaporation of HCl from the particle phase to the gas phase, in view of the much higher  
108 surface-to-volume ratios of aerosols compared to bulk solutions. Indeed, in an aqueous phase,  
109 NaNO<sub>3</sub> would be present mostly in the form of Na<sup>+</sup> and NO<sub>3</sub><sup>-</sup>, and HA can be dissociated into  
110 H<sup>+</sup> and A<sup>-</sup>. Whereas, not considering the displacement reaction equilibrium, the amounts of  
111 dissociated H<sup>+</sup> and A<sup>-</sup> are limited according to the acid dissociation constants of organic acids.  
112 Based on this, the formed NaA (aqueous or solid) and dissolved HCl or HNO<sub>3</sub> are very  
113 limited and cannot be detected by our IR spectra (seen Fig. 5d and 6d). Furthermore, HCl and  
114 HNO<sub>3</sub> have the very high volatility, i.e., low Henry's law constants (HCl:  $< 2 \times 10^{-1}$ ; HNO<sub>3</sub>:  $>$   
115  $2 \times 10^5$ ), and thus they tend to partition from the particle phase to the gas phase, causing the  
116 shift of the reaction R1 to the right and much more NaA formation.

117 8. Line 52: State for what concentration/conditions. Are you comparing at the same RH or the  
118 same water content or the same molar concentration of dissolved solutes?

119 **Author reply:** Thanks for the reviewer's suggestion. We have stated that in mixed  
120 NaCl/citric acid droplets with molar ratio of 1:1, dissociated HCl concentration is  $\sim 10^{10}$   
121 times higher than dissociated citric acid according to the different acid dissociation constants  
122 ( $K_{a1}$ ) (HCl:  $> 1 \times 10^7$ , citric acid:  $8.4 \times 10^{-4}$ ) (Laskin et al., 2012).

123 9. Line 58: define the base of the logarithm and perhaps at first use, define the meaning of pKa1  
124 formally using molal activities or standard chemical potentials, as appropriate given the  
125 values stated.

126 **Author reply:** Thanks for the reviewer's suggestion. We have adopted the reviewer's advice  
127 and revised our manuscript accordingly.

128 10. Line 66: what "substrate" is here referred to? do you mean material onto which particles were  
129 deposited in laboratory experiments?

130 **Author reply:** The substrate materials referred to the substrates on which particles were  
131 deposited in the previous studies. For instance, in Ghorai's study, the submicrometer  
132 NaCl/MA(GA) particles were deposited on  $\text{Si}_3\text{N}_4$  windows and TEM grids (Ghorai et al.,  
133 2014). In another study, the micron-sized  $\text{NaNO}_3/\text{MA}(\text{GA})$  particles were deposited on  
134 carbon-filmed grids or  $\text{Si}_3\text{N}_4$  windows (Wang and Laskin, 2014). While Ma et al. (2013)  
135 placed mixed NaCl/MA(GA) particles in aluminum sample holder or on Ge substrate.

136 11. Line 70: "... the substrate supporting OA droplets would crystallize to form"; do you mean the  
137 droplet / OA or really the substrate? Clarify phrasing.

138 **Author reply:** Thanks for the reviewer's suggestion. We have revised "substrate supporting  
139 OA droplets" into "OA droplets deposited on polytetrafluoroethylene (PTFE) substrate".

140 12. Line 70: "OA dihydrate at 71% RH" Is it under conditions of dehumidification? Describe  
141 what kind of laboratory experiment you refer to.

142 **Author reply:** Thanks for the reviewer's suggestion. We have revised "at  $\sim 71\%$  RH" into "at  
143  $\sim 71\%$  relative humidity (RH) during dehydration".

144 13. Line 72: "Pure  $\text{NaNO}_3$  droplets might not be effloresced..." By "be effloresced" do you rather  
145 mean "crystallize" here? Note that effloresced is not necessarily the same as crystalline in the

146 context of amorphous solids as a possibility. Also, clarify under what conditions; here  
147 presumably dehydration in an isothermal (and isobaric) experiment.

148 **Author reply:** Thanks for the reviewer’s suggestion. “Pure NaNO<sub>3</sub> droplets might not be  
149 effloresced but convert into amorphous state at low RH” indicated that NaNO<sub>3</sub> droplets could  
150 neither be crystallized, nor be effloresced to amorphous solids, but instead formed viscous  
151 supersaturated liquids at low RH (Liu et al., 2008). For clarity, we have revised “amorphous  
152 state at low RH” into “highly concentrated droplets at low RH upon drying” in the text.

153 14. Line 73: “certain RH values” Which ones? Please provide values/ranges.

154 **Author reply:** Thanks for the reviewer’s suggestion. We have adopted the reviewer’s advice  
155 and revised our manuscript accordingly.

156 15. Line 74: Given the stated list of options, how is “highly viscous” different from glassy or  
157 semisolid? One could say "highly viscous (i.e. semisolid or glassy), liquid, or mixed-phase  
158 (e.g. solid–liquid) mixing states.

159 **Author reply:** Thanks for the reviewer’s suggestion. We have adopted the reviewer’s advice  
160 and revised our manuscript accordingly.

161 16. Line 75: Koop et al. (2011, doi:10.1039/C1CP22617G) would be another key reference to cite  
162 here.

163 **Author reply:** Thanks for the reviewer’s suggestion. We have adopted the reviewer’s advice  
164 and revised our manuscript accordingly.

165 17. Line 82: phrasing: “would” or rather “does” it?

166 **Author reply:** Thanks for the reviewer’s suggestion. We have adopted the reviewer’s advice  
167 and revised our manuscript accordingly.

168 18. Line 85: delete “mixture”; it is redundant with solution.

169 **Author reply:** Thanks for the reviewer’s suggestion. We have adopted the reviewer’s advice  
170 and revised our manuscript accordingly.

171 19. Line 92: “... a brief was introduced here”; phrasing.

172 **Author reply:** Thanks for the reviewer’s suggestion. We have adopted the reviewer’s advice  
173 and revised our manuscript accordingly.

174 20. Line 103: “chamber, which could be used to calibrate the ambient RH”; in the context of this

175 description, it is mentioned that water vapor and CO<sub>2</sub> were removed by the vacuum pump. So,  
176 how was the RH established in the sample chamber? Is it due to remaining water vapor under  
177 low pressure conditions? If so, does that mean that the sample droplets are (potentially)  
178 evaporating water alongside with HNO<sub>3</sub> and DCA? The droplets may also outgas dissolved  
179 CO<sub>2</sub> during the experiment given the vacuum applied, which might have some effect on the  
180 acidity.

181 **Author reply:** Before the measurements, the water vapor and CO<sub>2</sub> were removed by the  
182 vacuum pump and the pressure in the sample chamber could arrive to ~ 0.01 kPa. After that,  
183 water vapor from the water reservoir was fed into the sample chamber to establish the ambient  
184 RH in the sample chamber. When the outlet of water vapour was closed, the water vapour  
185 pressure in the sample chamber would keep equilibrium with that of water reservoir, and the  
186 maximum RH at the certain temperatures could be reached. In addition, the liquid water in the  
187 sample droplets did evaporate alongside with very small amounts of HNO<sub>3</sub> and DCAs in the  
188 vacuuming process. The HNO<sub>3</sub> release and DCA salts formation during vacuuming have been  
189 indicated in the text. Besides, the dissolved CO<sub>2</sub> in micron-sized droplets was very limited,  
190 and it was conceivable that the influence of outgassing of dissolved CO<sub>2</sub> on droplet acidity,  
191 and thus the nitrate depletion in mixed NaNO<sub>3</sub>/DCA particles, was negligible.

192 21. Line 127: “and anhydrous OA” I suggest to mention that you refer to crystalline anhydrous  
193 OA here.

194 **Author reply:** Thanks for the reviewer’s suggestion. We have adopted the reviewer’s advice  
195 and revised our manuscript accordingly.

196 22. Line 131: “... indicative of the NaHC<sub>2</sub>O<sub>4</sub>...”; Is this referring to an actual solid NaHC<sub>2</sub>O<sub>4</sub>  
197 component forming or rather the presence of partially dissociated OA anions (HC<sub>2</sub>O<sub>4</sub><sup>-</sup>) in  
198 aqueous solution alongside Na<sup>+</sup>? In the latter case, this should not be referred to as NaHC<sub>2</sub>O<sub>4</sub>  
199 since it is not forming a compound of that structure nor stoichiometry. Also, in that case, this  
200 does not confirm directly the release of HNO<sub>3</sub>, it only indicated the presence of partially  
201 dissociated OA. Please discuss.

202 **Author reply:** Thanks for the reviewer’s suggestion. We have revised “NaHC<sub>2</sub>O<sub>4</sub>” into  
203 “dissociated HC<sub>2</sub>O<sub>4</sub>” in the revised manuscript. As indicated above, the amounts of

204 dissociated  $\text{HC}_2\text{O}_4^-$  from OA were very limited and could not be detected by our IR spectra  
205 assuming that no displacement reactions occurred. Furthermore, the release of  $\text{HNO}_3$ , which  
206 has been demonstrated in the earlier studies and discussed above, would shift the reaction R1  
207 to the right. Therefore, more OA was dissociated into  $\text{HC}_2\text{O}_4^-$  in the presence of  $\text{Na}^+$  along  
208 with continuous  $\text{HNO}_3$  release, as indicated in reaction R2.

209 23. Line 132: “Likewise, Wang et al. (2017) observed the formation of  $\text{NH}_4\text{HC}_2\text{O}_4$  in mixed  
210  $(\text{NH}_4)_2\text{SO}_4/\text{OA}$  droplets upon drying. These scenarios confirm the nitrate depletion and  $\text{HNO}_3$   
211 release from  $\text{NaNO}_3/\text{OA}$  mixtures in the vacuuming process.” The provided data and  
212 discussion does not uniquely support this conclusion. While  $\text{HNO}_3$  evaporation is possible,  
213 where is the evidence for it? Oxalate salts could form also without any loss of  $\text{HNO}_3$  to the  
214 gas phase. For example,  $\text{HNO}_3(\text{aq})$  could form or, more likely,  $\text{H}^+(\text{aq})$  and  $\text{NO}_3^-(\text{aq})$   
215 alongside solid or dissolved OA salts. Please provide evidence or a more nuanced discussion.

216 **Author reply:** As discussed in the author reply for the major comment, the  $\text{HNO}_3$  release  
217 from mixed nitrate and organic acid particles has been widely detected in field and laboratory  
218 measurements. Also, the  $\text{HNO}_3$  in the aqueous phase tends to partition into the gas phase due  
219 to the high volatility, i.e., low Henry’s law constants ( $> 2 \times 10^5$ ), of  $\text{HNO}_3$  and the high  
220 surface-to-volume ratios of aqueous droplets. Therefore, the formation of OA salts would be  
221 accompanied by  $\text{HNO}_3$  release, in other words, the oxalate salts formation did confirm the  
222 nitrate depletion and  $\text{HNO}_3$  release from  $\text{NaNO}_3/\text{OA}$  mixtures.

223 24. Line 145: “Likewise, Ma et al. (2013) found that the DRH of NaCl component decreased in  
224 both external and internal NaCl/MA mixtures.” How could this be the case in an external  
225 mixture (assuming external means (pure) NaCl particles separate from MA particles)?

226 Also, worth mentioning in the context of DRH lowering: a lowering of the DRH in particles  
227 containing aqueous DCAs is expected from thermodynamic equilibrium theory and has been  
228 shown in many other measurements and by means of thermodynamic model predictions, such  
229 as those shown for MA or OA and ammonium sulfate by Bouzidi et al. (2020,  
230 doi:10.1016/j.atmosenv.2020.117481) and those shown by Hodas et al. (2015,  
231 doi:10.5194/acp-15-5027-2015) for mixtures of ammonium sulfate with DCAs and citric acid

232 **Author reply:** Thanks for the reviewer’s suggestion. In Ma’s study, they found that externally



233 and internally mixed NaCl/MA particles exhibited DRH in the range of 65-70% RH and 60-65%  
234 RH, respectively, which were lower than the DRH of pure NaCl particles (75% RH). Indeed,  
235 it might be implausible that the dissolution of external NaCl particles were influenced by  
236 separated MA particles. One possible reason for this might be that the contact of solution  
237 films of separated NaCl and MA particles, caused by water absorption of solid particles at RH  
238 below the DRH (Bruzewicz et al., 2011; Wise et al., 2008), led to the decrease in surface  
239 tensions of solutions and enhancement of water absorption, which further reduced the DRH of  
240 pure components. Whereas for clarity, we have deleted this sentence and added the citations  
241 of relevant studies by Bouzidi et al. and Hodas et al.

242 25. Line 146: “Note that the OA dihydrate and crystalline  $\text{Na}_2\text{C}_2\text{O}_4$  cannot be deliquesced due to  
243 their very high DRHs ...”. A note: the process of deliquescence, as more clearly observed in  
244 binary (water + 1 solute) systems, should not be confused with partial (gradual) dissolution in  
245 multicomponent, multiphase systems. Therefore, please clarify the sentence. At present it is  
246 misleading. While crystalline substances like OA and  $\text{Na}_2\text{C}_2\text{O}_4$  may not fully dissolve, it  
247 should be noted that in the presence of an aqueous phase a solid–liquid equilibrium will be  
248 established (given enough time) and some amount of OA and  $\text{Na}_2\text{C}_2\text{O}_4$  will be in the  
249 dissolved state, forming a saturated aqueous solution with respect to the pertaining crystalline  
250 phase or phases; see, e.g. the discussion by Hodas et al. (2016,  
251 doi:10.5194/acp-16-12767-2016).

252 **Author reply:** Thanks for the reviewer’s suggestion. We have adopted the reviewer’s advice  
253 and revised our manuscript accordingly.

254 26. Line 155: “Upon hydration, the water content at high RH is far below that upon  
255 dehydration, ...” This statement needs further clarification. It seems only to make sense when  
256 the dehydration refers to dehydration from an initial state of completely dissolved particles at  
257 very high RH. Of course, one could start dehydration at any RH and then the water content  
258 could be higher or lower than when arrived at that state from an initial state of low RH.

259 **Author reply:** Thanks for the reviewer’s suggestion. We have adopted the reviewer’s advice  
260 and revised our manuscript accordingly.

261 27. Line 159: I find Fig. S6 insightful and suggest that this figure and the related discussion be

262 moved to the main manuscript.

263 **Author reply:** Thanks for the reviewer's suggestion. We have adopted the reviewer's advice  
264 and revised our manuscript accordingly.

265 28. Line 160: "Besides, as shown in Fig. 1c, the absorbance of  $1620\text{ cm}^{-1}$  band assigned to  
266 oxalate shows a slight increase at RH as low as 21.2%, implying the nitrate depletion  
267 proceeds at relatively low RH."

268 In my opinion, what is missing are observations of the loss of nitrate/ $\text{HNO}_3$  from the particles.  
269 Do the authors have comparison examples for cases where the gas phase exchange is limited  
270 (small gas volume) such that only a small loss could occur and, as a result, the signature in  
271 oxalate formation substantially different? Without such observations, or other quantitative  
272 measures of loss to the gas phase, the interpretation of the experiments hinges on assuming a  
273 nitrate depletion takes place without having the data to confirm it. Please discuss.

274 **Author reply:** As already indicated, Li et al. (2017) observed the Raman features of  
275 monosodium malonate in NaCl/MA mixed aerosols during the RH cycle, indicating the  
276 chloride depletion and gaseous HCl release. Wang et al. (2019) confirmed the ammonium  
277 depletion and gaseous  $\text{NH}_3$  release from mixed dicarboxylic acid salts and  $(\text{NH}_4)_2\text{SO}_4$   
278 aerosols during the RH cycle according to the IR feature changes of dicarboxylic acid salts  
279 and corresponding DCAs via the ATR-FTIR technique. Ma et al. (2013) also determined the  
280 oxalate formation and gaseous HCl release from NaCl/OA mixtures based on the Raman and  
281 ATR-FTIR characterization results. Therefore, the increase in absorbance of IR feature bands  
282 of oxalate is proved to be powerful evidence for nitrate depletion and gaseous  $\text{HNO}_3$  release.

283 29. Line 173: "As RH increases to  $\sim 15\%$ , the  $\Delta A$  of  $\nu_{\text{as}}(\text{COO}^-)$  band exhibits a considerable  
284 increase, indicative of the occurrence of nitrate depletion."

285 While indicative as an option, it remains speculative. It is indicative of the partial dissociation  
286 of OA in solution. Which is expected to increase with increasing particle water content and,  
287 hence, increasing RH.

288 **Author reply:** As already indicated, there were no IR feature bands of  $\text{COO}^-$ , e.g.,  $1465\text{ cm}^{-1}$   
289 band, in IR spectra of pure OA droplets, as shown in Fig. S3. Thus, the increase in  $\Delta A$  of  
290  $\nu_{\text{as}}(\text{COO}^-)$  band did indicate the occurrence of nitrate depletion.

291 30. Line 177: “2013). Then, the  $1620\text{ cm}^{-1}$  band appears and becomes stronger with time,  
292 suggesting  $\text{Na}_2\text{C}_2\text{O}_4$  can be continuously produced at constant  $\sim 15\%$  RH.”

293 I think this is better evidence for  $\text{Na}_2\text{C}_2\text{O}_4$  formation and associated nitrate depletion, because  
294 the system is observed at constant RH, which means it should maintain constant water activity  
295 (in sufficiently large particles where the Kelvin effect would not change with evaporation). It  
296 may be good to expand the discussion of this piece of evidence.

297 **Author reply:** Thanks for the reviewer’s suggestion. We have adopted the reviewer’s advice  
298 and revised our manuscript accordingly.

299 31. Line 179: “... we can infer the conversion of amorphous  $\text{NaNO}_3$  solids to highly viscous  
300 semisolids due to the uptake of trace amounts of moisture.”

301 Please clarify: semisolids of what? if  $\text{NaNO}_3$  dissolves partially and forms a viscous aqueous  
302 solution, this should not be called a  $\text{NaNO}_3$  semisolid because the formed phase contains  
303 other species too.

304 **Author reply:** Thanks for the reviewer’s suggestion. We inferred that amorphous  $\text{NaNO}_3$   
305 solids did not dissolve partially, based on the IR feature changes of  $\text{NO}_3^-$  as discussed above,  
306 but transformed into highly viscous  $\text{NaNO}_3$  semisolids. We have adopted the reviewer’s  
307 advice and revised our manuscript accordingly.

308 32. Line 216: Define the  $R^2$  metric.

309 **Author reply:** Thanks for the reviewer’s suggestion. We have adopted the reviewer’s advice  
310 and revised our manuscript accordingly.

311 33. Line 231: “As RH increases to around 15%, amorphous solids are converted into viscous  
312 semisolids, ...”. Is there any evidence from the spectra for such a conversion and the  
313 approximate viscosity of the phase to classify it as semisolid?

314 **Author reply:** Thanks for the reviewer’s suggestion. There were no spectra and viscosity data  
315 for the conversion of amorphous solids to semisolids. First of all,  $\text{NaNO}_3$  has been proved to  
316 exist in unusual metastable states, e.g., amorphous solids or highly concentrated droplets, after  
317 drying (Ma et al., 2021; Liu et al., 2008; Hoffman et al., 2004). Then, the chemical reactivity to  
318 liquid OA did alter as RH increased to  $\sim 15\%$  herein. Coupled with the particle morphology  
319 changes shown in Fig. 2, we can speculate that amorphous  $\text{NaNO}_3$  solids were converted into

320 viscous  $\text{NaNO}_3$  semisolids as RH increased to  $\sim 15\%$ .

321 34. Line 261: "... formation of monosodium malonate ...". Is this for a solid malonate phase or  
322 dissolved?

323 **Author reply:** Li et al. (2017) measured the Raman spectra of pure monosodium malonate  
324 (MSM) aerosols at RH = 10% and 2:1 NaCl/MA mixed aerosols at very low RH of 9.1% upon  
325 dehydration, which did not resemble that of MSM powders, suggesting that the pure MSM  
326 aerosols and mixed NaCl/MA aerosols tended to form amorphous states after drying.  
327 Furthermore, in this work, the IR feature band of MSM, i.e.,  $1595\text{ cm}^{-1}$  band, showed no  
328 obvious changes during humidification, as shown in Fig. 5c, indicating no deliquescence  
329 transition of MSM occurrence. Based on these, we can infer that the MSM component in  
330 mixed  $\text{NaNO}_3/\text{MA}$  aerosols was in amorphous liquids, rather than solid phases.

331 35. Line 266: Clarify: "that the first acid dissociation constant ( $\text{pK}_{\text{a}1}$ ) of MA was about 2.83,  
332 which was  $\sim 3$  orders of magnitude larger than the second one ...". 3 orders of magnitude in  
333 what? clearly not in  $\text{pK}_{\text{a}}$ . Also, 2.83 is the  $\text{pK}_{\text{a}1}$  not  $\text{K}_{\text{a}1}$  (which the current phrasing implies).

334 **Author reply:** Thanks for the reviewer's suggestion. We have adopted the reviewer's advice  
335 and revised our manuscript accordingly.

336 36. Line 270: band assigned to  $\nu_{\text{as}}(\text{COO}^-)$  of monosodium malonate. Please clarify: why of  
337 monosodium malonate and not of the malonate anion? The  $\text{COO}^-$  functionality does not  
338 contain any sodium and in aqueous solution the malonate ion is likely dissociated from  $\text{Na}^+$ . Is  
339 the assigned band specific to the  $\text{COO}^-$  group in crystalline monosodium malonate only?

340 **Author reply:** Thanks for the reviewer's suggestion. We have adopted the reviewer's advice  
341 and revised our manuscript accordingly.

342 37. Line 277: "aqueous  $\text{NaNO}_3$ " should be "aqueous  $\text{NO}_3$ ."

343 **Author reply:** Thanks for the reviewer's suggestion. We have adopted the reviewer's advice  
344 and revised our manuscript accordingly.

345 38. Line 279: "As compared to vacuum FTIR results, we can infer that the heterogeneous efficacy  
346 of Ge substrate is much higher than  $\text{CaF}_2$  windows,..." It seems unclear whether this is really  
347 a substrate effect or rather an effect of the vacuum cell procedures applied

348 **Author reply:** In our previous review, the efflorescence kinetics and nucleation mechanisms

349 were discussed detailed. The substrate effects have been proved to be a key factor to induce  
350 heterogeneous nucleation of aerosol particles. Furthermore, the heterogeneous nucleation  
351 efficiency of  $\text{CaF}_2$ , Ge and ZnSe substrates for deposited particles have been demonstrated in  
352 our earlier studies (Ma et al., 2019b; Ji et al., 2017; Zhang et al., 2014; Ren et al., 2016).

353 39. Line 290, Fig. 5: What explains the difference in the normalized water contents comparing  
354 panels (a) and (b)? Did you compare the obtained water contents to model predictions of the  
355 water content or independent mass growth factor measurements to assess which technique  
356 provides more accurate hygroscopic cycles?

357 **Author reply:** The difference in the normalized water content in panels (a) and (b) was  
358 attributed to the different sequences of water cycles. In other words, the deposited droplets in  
359 vacuum FTIR were first dried in vacuum, and then underwent a  
360 humidification-dehumidification cycle. According to the weak absorbance intensity of  $1548$   
361  $\text{cm}^{-1}$  band shown in Fig. 6c in the revised manuscript, we can infer that the nitrate depletion  
362 was limited and might not alter the hygroscopic ability of mixed aerosols. While for  
363 ATR-FTIR measurement, the mixed droplets first underwent the dehumidification process and  
364 then a humidification process. Upon hydration, the GA component mainly existed in solid  
365 state and could not be dissolved completely even until 84% RH, and thus the water content  
366 could not match with that in the dehumidification process. Note that the complete  
367 deliquescence of mixed  $\text{NaNO}_3/\text{GA}$  particles in vacuum FTIR measurement might be due to  
368 the partial crystallization of GA in the vacuuming process.

369 Firstly, the formation and precipitation of organic acid salts have not been considered by the  
370 current version of E-AIM, thus, the model cannot provide accurate hygroscopic growth  
371 factors for  $\text{NaNO}_3/\text{DCA}$  mixtures. Second, the mixed aerosols (e.g.,  $\text{NaNO}_3/\text{OA}$  mixtures)  
372 might exist in solid-liquid mixing state, not the aqueous solution state at high RH in the  
373 vacuum FTIR measurement. Therefore, we could not determine the mass growth factors of  
374 mixed particles through the absorbance of liquid water band and E-AIM predictions (even  
375 though the data was not accurate), according to the calculation method proposed by our earlier  
376 studies (Ma et al., 2019b; Ji et al., 2017). Note that the mass growth factors and E-AIM  
377 predictions of pure  $\text{NaNO}_3$  and DCA aerosols have been determined and shown in the

378 Supplement.

379 40. Line 301: “appears upon hydration, indicating the formation of glutarate sodium salts.” Could  
380 you clarify whether this means that a solid crystalline salt phase is forming upon hydration in  
381 equilibrium with an aqueous solution?

382 **Author reply:** Thanks for the reviewer’s suggestion. According to the hygroscopic  
383 behaviours of mixed NaNO<sub>3</sub>/GA particles and IR feature changes of  $\nu_{as}(\text{COO}^-)$ , which was  
384 similar to that of mixed NaNO<sub>3</sub>/MA particles, we can infer that the formed glutarate sodium  
385 salts were present in aqueous solution state. Furthermore, we have revised our manuscript  
386 accordingly.

387 41. Line 314: “lower temperature of droplets” Is it just the temperature effect or also the drying to  
388 much lower effective RH than during the ATR-FTIR measurement cycles?

389 **Author reply:** The lowest RH in the two measurements was comparable, i.e., 3.4% RH in  
390 vacuum FTIR vs. 5.6% RH in ATR-FTIR. The temperature effect caused by rapid water  
391 evaporation has been introduced in our previous study, which can facilitate the nucleation of  
392 aqueous droplets (Ma et al., 2019b).

393 42. Line 335: Could you discuss in this context whether the size dependence effect is due to the  
394 Kelvin effect, leading to a lower water activity and higher pH in smaller particles compared to  
395 larger ones exposed to the same RH in the gas phase, or some other effect?

396 **Author reply:** Thanks for the reviewer’s suggestion. As indicated in our previous review, the  
397 depletion extent,  $\xi$ , was related to depleted mass ( $\Delta m$ ) and initial mass ( $m_0$ ) of a volatile  
398 species within a droplet with the radius  $r$ , which could be expressed as  $\xi = \Delta m/m_0$  (Chen et al.,  
399 2021). The  $\Delta m$  could be calculated by  $\Delta m = 4\pi rMDp_r/(RT\Delta t)$  via the Maxwell steady-state  
400 diffusive mass transfer equation, where  $M$ ,  $D$ , and  $p_r$  denoted the volatile species molecular  
401 weight, diffusion coefficient in the air, and equilibrium partial pressure at the droplet surface,  
402 respectively;  $R$ ,  $T$ , and  $\Delta t$  were the ideal gas constant, temperature, and reaction time,  
403 respectively. The  $m_0$  of the volatile species could be expressed as  $m_0 = 4\pi r^3 c/3$ , since the  
404 concentration of the volatile species ( $c$ ) within the droplet kept constant at a fixed RH. Based  
405 on these, the  $\xi$  could be expressed as

406 
$$\xi = \frac{k}{r^2} \Delta t, \quad \text{with } k = \frac{3MDp_r}{4\pi cRT} \quad (1)$$

407 As seen, the depletion extent,  $\xi$ , was inversely proportional to  $r^2$ . Therefore, the size  
408 dependence effect of depletion extent was mainly due to the volatility difference, rather than  
409 the Kelvin effect.

410 43. Line 346, Eq. (5): check equation; it looks like the  $p$  of  $p_r$  is missing.

411 **Author reply:** Thanks for the reviewer's suggestion. We have adopted the reviewer's advice  
412 and revised our manuscript accordingly.

413 44. Line 358: Eq. (6), for consistency with Eq. (7), consider replacing  $P$  by  $p^*$ .

414 **Author reply:** Thanks for the reviewer's suggestion. Firstly, we indicated the expression of  
415 the diffusion coefficient of  $\text{HNO}_3$  in the gas phase according to Chapman-Enskog method. In  
416 other words, the  $D$  denoted to the diffusion coefficient of  $\text{HNO}_3$  in the ATR-FTIR  
417 measurement. Then, the  $\text{HNO}_3$  diffusion coefficient in vacuum FTIR measurement, which  
418 was defined as  $D^*$ , was related to the ambient pressure in vacuum FTIR,  $P^*$ . Thus, the  $P$  in  
419 the eq. (6) did not only denote to  $P^*$  in the eq. (7).

420 45. Line 373: "Therefore, the ambient pressure, dominating the diffusion coefficient of  $\text{HNO}_3$  in  
421 the gas phase, tends to play an important role in nitrate depletion during the transport and  
422 aging of atmospheric aerosols."

423 This statement is not supported by any quantitative data. How big of a difference is expected  
424 in the troposphere? Obviously, one should not directly compare the vacuum FTIR pressure to  
425 realistic tropospheric conditions without accounting for the differences in the ranges of total  
426 pressures. If nitrate-containing particles are given hours to days to undergo displacement  
427 reactions, the impact of pressure on  $\text{HNO}_3$  diffusion may be unimportant. Do you have  
428 predictions to the contrary?

429 **Author reply:** Thanks for the reviewer's constructive suggestion. We have deleted the  
430 improper statement, i.e., "Therefore, the ambient pressure, dominating the diffusion  
431 coefficient of  $\text{HNO}_3$  in the gas phase, tends to play an important role in nitrate depletion  
432 during the transport and aging of atmospheric aerosols." in the revised manuscript.

433 46. Line 409: " $\text{NaNO}_3$  can be treated as a surrogate for a broad class of amorphous or semisolid  
434 species existing in atmospheric aerosols,..."

435 Please state in what RH range this semisolid state applies.  $\text{NaNO}_3$  is certainly dissolved and

436 liquid-like in dilute aqueous aerosols at elevated RH (for aqueous NaNO<sub>3</sub> viscosity data see  
437 e.g. Baldelli et al., 2016, doi:10.1080/02786826.2016.1177163; Lilek and Zuend, 2022,  
438 doi:10.5194/acp-22-3203-2022).

439 **Author reply:** Thanks for the reviewer's suggestion. We have adopted the reviewer's advice  
440 and revised our manuscript accordingly.

441 47. Line 427: "metastable or liquid-like state..." Please rephrase; metastable and liquid-like  
442 characterize two different properties. One related to the supersaturation of aqueous solutions  
443 with respect to a certain crystalline phase, while the other refers to a phase state (viscosity  
444 related).

445 **Author reply:** Thanks for the reviewer's suggestion. We have adopted the reviewer's advice  
446 and revised our manuscript accordingly.

447 **Supplement: minor comments**

448 48. SI, lines 20–36: How was that ERH determined? Was it based on just some features of the  
449 spectra? Fig. S1a does not seem to indicate any clear signature of efflorescence. Specifically,  
450 note that in the absence of severe kinetic limitations, one would expect a sharp change in mass  
451 growth factor at the ERH (point of crystallization) of a single-solute particle. Certainly so for  
452 a system at equilibrium with the gas phase. Why is that not the case for the systems shown in  
453 Fig. S1? Figure S2 shows also no indication of NaNO<sub>3</sub> crystallization. Do the authors use the  
454 term "efflorescence" for a phase transition other than crystallization? If so, that would be  
455 untypical given the common use and meaning of this term and might need clarification in the  
456 text.

457 **Author reply:** The ERH of NaNO<sub>3</sub> was determined via the IR feature changes of NO<sub>3</sub><sup>-</sup>, i.e.,  
458 the broad ~ 1350 cm<sup>-1</sup> band was transformed into a sharper peak, as shown in Fig. S1b and  
459 S2b. The absence of sharp decrease in mass growth factor at the ERH was attributed to the  
460 specific structure of nitrates after drying, i.e., amorphous solids. Likewise, Li et al. (2021)  
461 observed the hygroscopic behaviours of pure (NH<sub>4</sub>)<sub>2</sub>SO<sub>4</sub> and NH<sub>4</sub>NO<sub>3</sub> particles during the RH  
462 cycles. They found that mass growth factor of (NH<sub>4</sub>)<sub>2</sub>SO<sub>4</sub> particles would decrease sharply at  
463 the ERH, while mass growth factor of NH<sub>4</sub>NO<sub>3</sub> particles decreased routinely without the  
464 turning point at the ERH. Meanwhile, the 1435 cm<sup>-1</sup> band assigned to NH<sub>4</sub><sup>+</sup> in the solution



465 phase red-shifted to  $1415\text{ cm}^{-1}$ , suggesting the occurrence of efflorescence of  $\text{NH}_4\text{NO}_3$   
466 particles at 25% RH. Furthermore, Tang and Fung (1997) found that Raman spectra  
467 characteristic of dried  $\text{Ca}(\text{NO}_3)_2$  particles was obviously different from that of anhydrous  
468 crystals, indicating the amorphous solids formation. Meanwhile, no sharp decrease in the  
469 water content of  $\text{Ca}(\text{NO}_3)_2$  particles was observed during the dehumidification, and the  
470 amorphous solids would deliquesce at RH well below the DRH of anhydrous crystals, which  
471 showed good agreement with the observations for  $\text{NaNO}_3$  particles in this work. In addition,  
472 the term “efflorescence” did indicate the formation of amorphous solids rather than the  
473 crystallization here. For clarity, we have revised our manuscript accordingly.

474 49. SI, line 40: what about that of a  $\text{NaNO}_3$  hydrate crystal? Would equilibrium thermodynamics  
475 not require that amorphous solids take up some water upon hydration (while single-solute  
476 crystalline particles may not)?

477 **Author reply:** As indicated in the Supplement, the  $\nu_3(\text{NO}_3^-)$  feature bands after drying in the  
478 two measurements are inconsistent with the IR feature of  $\text{NaNO}_3$  crystals, i.e., two shoulder  
479 peaks centred at  $1383$  and  $1485\text{ cm}^{-1}$  arising from splitting of the degenerate  $\nu_3$  mode (Liu et  
480 al., 2008). Liu et al. (2008) also found small amounts of water present within particles after  
481 dehydration and the particles absorb water continuously upon hydration, indicating the  
482 formation of highly concentrated droplets after drying, rather than amorphous  $\text{NaNO}_3$  solids.  
483 The amorphous nitrate solids (e.g.,  $\text{Sr}(\text{NO}_3)_2$  and  $\text{Ca}(\text{NO}_3)_2$ ) would not obviously absorb  
484 water until their DRHs (Tang and Fung, 1997).

485 50. SI, lines 155–158, 166: these sentences are inconsistent. One is about HCl release, the other  
486 about  $\text{HNO}_3$  but referring to the same study. Please clarify.

487 **Author reply:** Thanks for the reviewer’s suggestion. We have revised the error in the revised  
488 manuscript.

489 51. SI, line 178: molecular weight (or rather molar mass) of water should be stated in  $\text{kg mol}^{-1}$  to  
490 stay consistent with the other units given. Other there will be an incorrect Kelvin effect value.

491 **Author reply:** Thanks for the reviewer’s suggestion. We have revised the error in the revised  
492 manuscript.

493 52. SI, line 188: It should be stated that the true equilibria in aqueous solution involve use of the

494 activities of the species, not the molar concentrations. Also, on line 210, state that  
495 self-dissociation of H<sub>2</sub>O is not considered.

496 **Author reply:** Thanks for the reviewer's suggestion. The calculated pH here can be defined  
497 as free-H<sup>+</sup> approximation of pH on a molality basis, as indicated by Pye et al. (2020).  
498 Furthermore, we have considered the self-dissociation of H<sub>2</sub>O in eq. (11) in the revised  
499 Supplement.

500 53. SI, line 216: given definition of pH; note that this refers only to an approximate,  
501 molarity-based pH, as discussed by Pye et al. (2020, doi:10.5194/acp-20-4809-2020). The  
502 proper definition of pH involves the molality-based activity of H<sup>+</sup>.

503 **Author reply:** Thanks for the reviewer's suggestion. We have adopted the reviewer's advice  
504 and revised our manuscript accordingly.

505

#### 506 Reference:

- 507 Bruzewicz, D. A., Checco, A., Ocko, B. M., Lewis, E. R., McGraw, R. L., and Schwartz, S. E.:  
508 Reversible uptake of water on NaCl nanoparticles at relative humidity below deliquescence point  
509 observed by noncontact environmental atomic force microscopy, *J. Chem. Phys.*, 134, 044702,  
510 <https://doi.org/10.1063/1.3524195>, 2011.
- 511 Chen, Z., Liu, P., Liu, Y., and Zhang, Y. H.: Strong acids or bases displaced by weak acids or bases in  
512 aerosols: Reactions driven by the continuous partitioning of volatile products into the gas phase, *Acc.*  
513 *Chem. Res.*, 54, 3667-3678, <https://doi.org/10.1021/acs.accounts.1c00318>, 2021.
- 514 Du, C. Y., Yang, H., Wang, N., Pang, S. F., and Zhang, Y. H.: pH effect on the release of NH<sub>3</sub> from the  
515 internally mixed sodium succinate and ammonium sulfate aerosols, *Atmos. Environ.*, 220, 117101,  
516 <https://doi.org/10.1016/j.atmosenv.2019.117101>, 2020.
- 517 Ghorai, S., Wang, B. B., Tivanski, A., and Laskin, A.: Hygroscopic properties of internally mixed  
518 particles composed of NaCl and water-soluble organic acids, *Environ. Sci. Technol.*, 48, 2234-2241,  
519 <https://doi.org/10.1021/es404727u>, 2014.
- 520 He, X., Leng, C., Pang, S., and Zhang, Y.: Kinetics study of heterogeneous reactions of ozone with  
521 unsaturated fatty acid single droplets using micro-FTIR spectroscopy, *RSC Adv.*, 7, 3204-3213,  
522 <https://doi.org/10.1039/c6ra25255a>, 2017.
- 523 Hoffman, R. C., Laskin, A., and Finlayson-Pitts, B. J.: Sodium nitrate particles: physical and chemical  
524 properties during hydration and dehydration, and implications for aged sea salt aerosols, *J. Aerosol Sci.*,  
525 35, 869-887, <https://doi.org/10.1016/j.jaerosci.2004.02.003>, 2004.
- 526 Ji, Z. R., Zhang, Y., Pang, S. F., and Zhang, Y. H.: Crystal nucleation and crystal growth and mass  
527 transfer in internally mixed sucrose/NaNO<sub>3</sub> particles, *J. Phys. Chem. A*, 121, 7968-7975,  
528 <https://doi.org/10.1021/acs.jpca.7b08004>, 2017.
- 529 Jing, B., Wang, Z., Tan, F., Guo, Y. C., Tong, S. R., Wang, W. G., Zhang, Y. H., and Ge, M. F.:  
530 Hygroscopic behavior of atmospheric aerosols containing nitrate salts and water-soluble organic acids,

531 Atmos. Chem. Phys., 18, 5115-5127, <https://doi.org/10.5194/acp-18-5115-2018>, 2018.

532 Laskin, A., Moffet, R. C., Gilles, M. K., Fast, J. D., Zaveri, R. A., Wang, B. B., Nigge, P., and  
533 Shutthanandan, J.: Tropospheric chemistry of internally mixed sea salt and organic particles: Surprising  
534 reactivity of NaCl with weak organic acids, *J. Geophys. Res.-Atmos.*, 117, D15302,  
535 <https://doi.org/10.1029/2012jd017743>, 2012.

536 Li, Q., Ma, S. S., Pang, S. F., and Zhang, Y. H.: Measurement on mass growth factor of (NH<sub>4</sub>)<sub>2</sub>SO<sub>4</sub>,  
537 NH<sub>4</sub>NO<sub>3</sub> and mixed (NH<sub>4</sub>)<sub>2</sub>SO<sub>4</sub>/NH<sub>4</sub>NO<sub>3</sub> aerosols under linear RH changing mode, *Spectrosc. Spectral*  
538 *Anal.*, 41, 3444-3450, [https://doi.org/10.3964/j.issn.1000-0593\(2021\)11-3444-07](https://doi.org/10.3964/j.issn.1000-0593(2021)11-3444-07), 2021.

539 Li, X., Gupta, D., Lee, J., Park, G., and Ro, C.-U.: Real-time investigation of chemical compositions  
540 and hygroscopic properties of aerosols generated from NaCl and malonic acid mixture solutions using  
541 in situ Raman microspectrometry, *Environ. Sci. Technol.*, 51, 263-270,  
542 <https://doi.org/10.1021/acs.est.6b04356>, 2017.

543 Liu, Y., Yang, Z. W., Desyaterik, Y., Gassman, P. L., Wang, H., and Laskin, A.: Hygroscopic behavior  
544 of substrate-deposited particles studied by micro-FT-IR spectroscopy and complementary methods of  
545 particle analysis, *Anal. Chem.*, 80, 633-642, <https://doi.org/10.1021/ac701638r>, 2008.

546 Ma, Q. X., Ma, J. Z., Liu, C., Lai, C. Y., and He, H.: Laboratory study on the hygroscopic behavior of  
547 external and internal C<sub>2</sub>-C<sub>4</sub> dicarboxylic acid-NaCl mixtures, *Environ. Sci. Technol.*, 47, 10381-10388,  
548 <https://doi.org/10.1021/es4023267>, 2013.

549 Ma, Q. X., Zhong, C., Liu, C., Liu, J., Ma, J. Z., Wu, L. Y., and He, H.: A comprehensive study about  
550 the hygroscopic behavior of mixtures of oxalic acid and nitrate salts: Implication for the occurrence of  
551 atmospheric metal oxalate complex, *ACS Earth Space Chem.*, 3, 1216-1225,  
552 <https://doi.org/10.1021/acsearthspacechem.9b00077>, 2019a.

553 Ma, S. S., Yang, W., Zheng, C. M., Pang, S. F., and Zhang, Y. H.: Subsecond measurements on aerosols:  
554 From hygroscopic growth factors to efflorescence kinetics, *Atmos. Environ.*, 210, 177-185,  
555 <https://doi.org/10.1016/j.atmosenv.2019.04.049>, 2019b.

556 Ma, S. S., Yang, M., Pang, S. F., and Zhang, Y. H.: Subsecond measurement on deliquescence kinetics  
557 of aerosol particles: Observation of partial dissolution and calculation of dissolution rates,  
558 *Chemosphere*, 264, 128507, <https://doi.org/10.1016/j.chemosphere.2020.128507>, 2021.

559 Pye, H. O. T., Nenes, A., Alexander, B., Ault, A. P., Barth, M. C., Clegg, S. L., Collett Jr, J. L., Fahey,  
560 K. M., Hennigan, C. J., Herrmann, H., Kanakidou, M., Kelly, J. T., Ku, I. T., McNeill, V. F., Riemer, N.,  
561 Schaefer, T., Shi, G., Tilgner, A., Walker, J. T., Wang, T., Weber, R., Xing, J., Zaveri, R. A., and Zuend,  
562 A.: The acidity of atmospheric particles and clouds, *Atmos. Chem. Phys.*, 20, 4809-4888,  
563 <https://doi.org/10.5194/acp-20-4809-2020>, 2020.

564 Ren, H. M., Cai, C., Leng, C. B., Pang, S. F., and Zhang, Y. H.: Nucleation kinetics in mixed  
565 NaNO<sub>3</sub>/glycerol droplets investigated with the FTIR-ATR technique, *J. Phys. Chem. B*, 120,  
566 2913-2920, <https://doi.org/10.1021/acs.jpcc.5b12442>, 2016.

567 Shao, X., Wu, F. M., Yang, H., Pang, S. F., and Zhang, Y. H.: Observing HNO<sub>3</sub> release dependent upon  
568 metal complexes in malonic acid/nitrate droplets, *Spectrochim. Acta A*, 201, 399-404,  
569 <https://doi.org/10.1016/j.saa.2018.05.026>, 2018.

570 Tang, I. N., and Fung, K. H.: Hydration and Raman scattering studies of levitated microparticles:  
571 Ba(NO<sub>3</sub>)<sub>2</sub>, Sr(NO<sub>3</sub>)<sub>2</sub>, and Ca(NO<sub>3</sub>)<sub>2</sub>, *J. Chem. Phys.*, 106, 1653-1660, <https://doi.org/10.1063/1.473318>,  
572 1997.

573 Wang, B. B., and Laskin, A.: Reactions between water-soluble organic acids and nitrates in  
574 atmospheric aerosols: Recycling of nitric acid and formation of organic salts, *J. Geophys. Res.-Atmos.*,

575 119, 3335-3351, <https://doi.org/10.1002/2013jd021169>, 2014.

576 Wang, N., Jing, B., Wang, P., Wang, Z., Li, J. R., Pang, S. F., Zhang, Y. H., and Ge, M. F.:  
577 Hygroscopicity and compositional evolution of atmospheric aerosols containing water-soluble  
578 carboxylic acid salts and ammonium sulfate: Influence of ammonium depletion, *Environ. Sci. Technol.*,  
579 53, 6225-6234, <https://doi.org/10.1021/acs.est.8b07052>, 2019.

580 Wise, M. E., Martin, S. T., Russell, L. M., and Buseck, P. R.: Water uptake by NaCl particles prior to  
581 deliquescence and the phase rule, *Aerosol Sci. Technol.*, 42, 281-294,  
582 <https://doi.org/10.1080/02786820802047115>, 2008.

583 Wu, Z. J., Nowak, A., Poulain, L., Herrmann, H., and Wiedensohler, A.: Hygroscopic behavior of  
584 atmospherically relevant water-soluble carboxylic salts and their influence on the water uptake of  
585 ammonium sulfate, *Atmos. Chem. Phys.*, 11, 12617-12626, <https://doi.org/10.5194/acp-11-12617-2011>,  
586 2011.

587 Zhang, Q. N., Zhang, Y., Cai, C., Guo, Y. C., Reid, J. P., and Zhang, Y. H.: In situ observation on the  
588 dynamic process of evaporation and crystallization of sodium nitrate droplets on a ZnSe substrate by  
589 FTIR-ATR, *J. Phys. Chem. A*, 118, 2728-2737, <https://doi.org/10.1021/jp412073c>, 2014.

590
